# Supplementary material
Source: Royal Society of Chemistry journal article supplement (doi:10.1039/d6fo00337k)

## Supplementary Information 1

RT: 0.00 - 22.55 SM: 7B

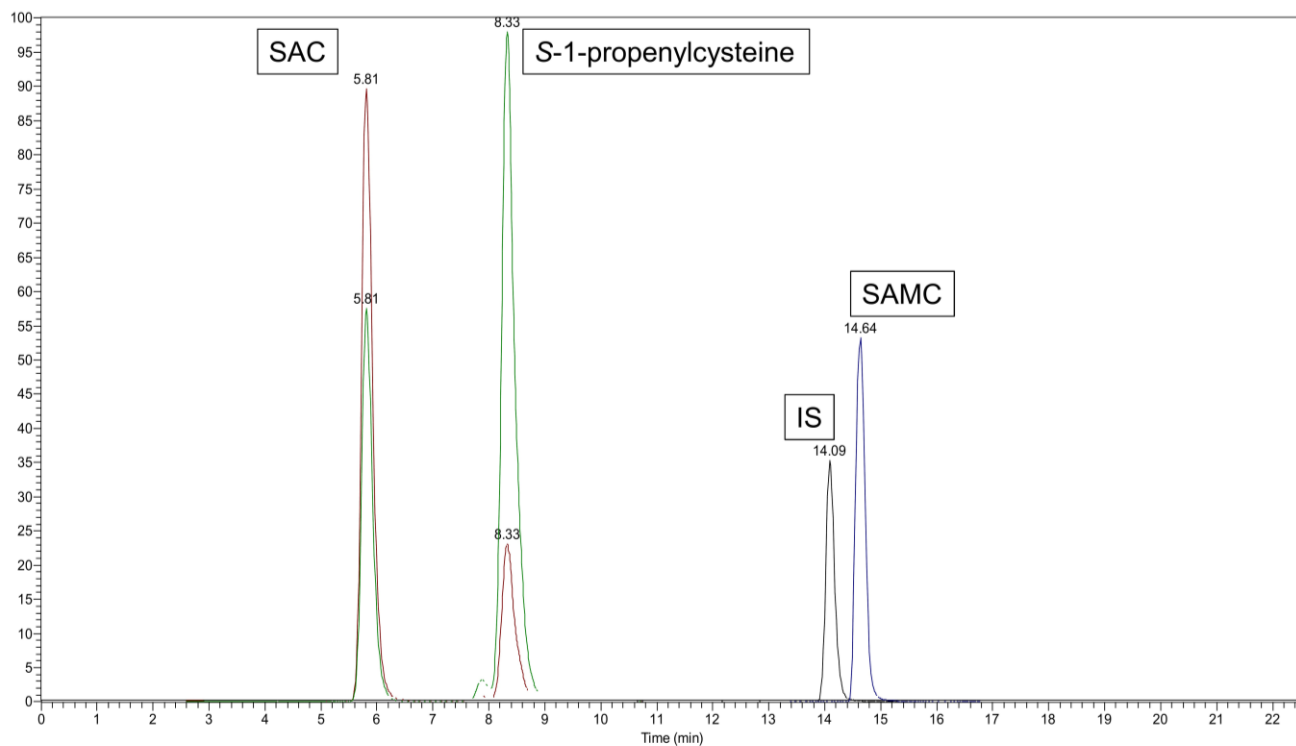

Supplement: d6fo00337k1.pdf [file d6fo00337k1.pdf]

## Supplementary Information 2

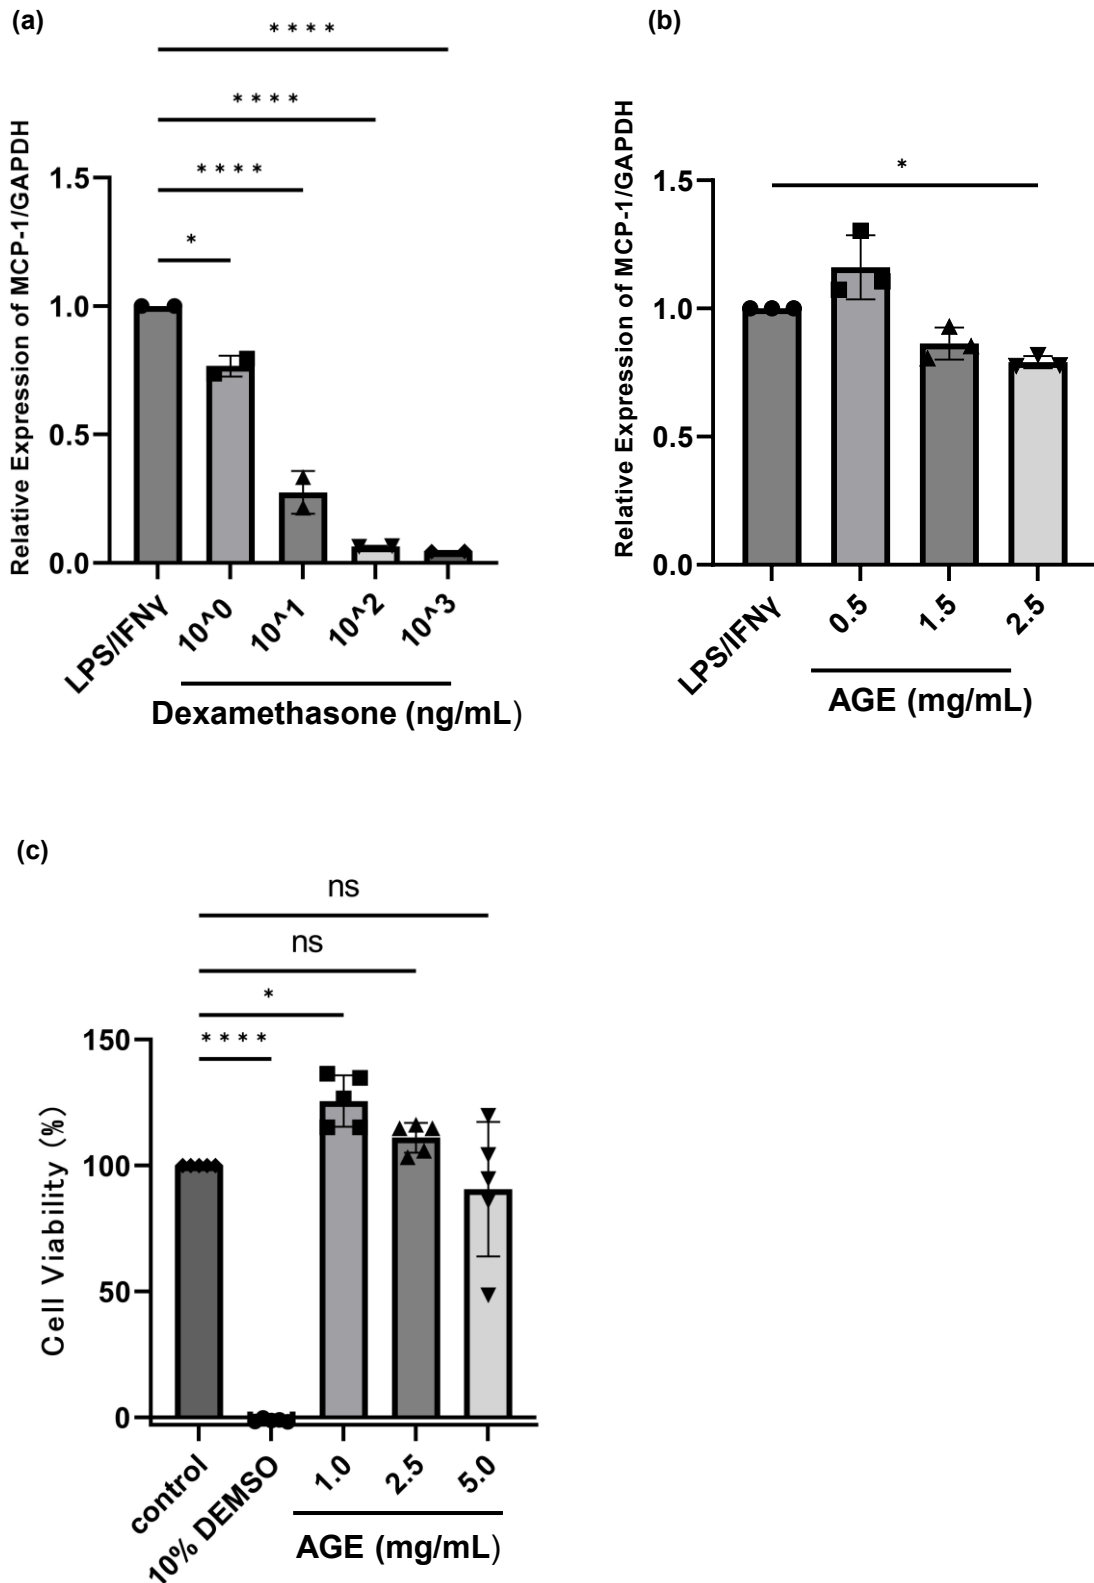

Supplement: d6fo00337k2.pdf [file d6fo00337k2.pdf]

### Supplementary Information 3

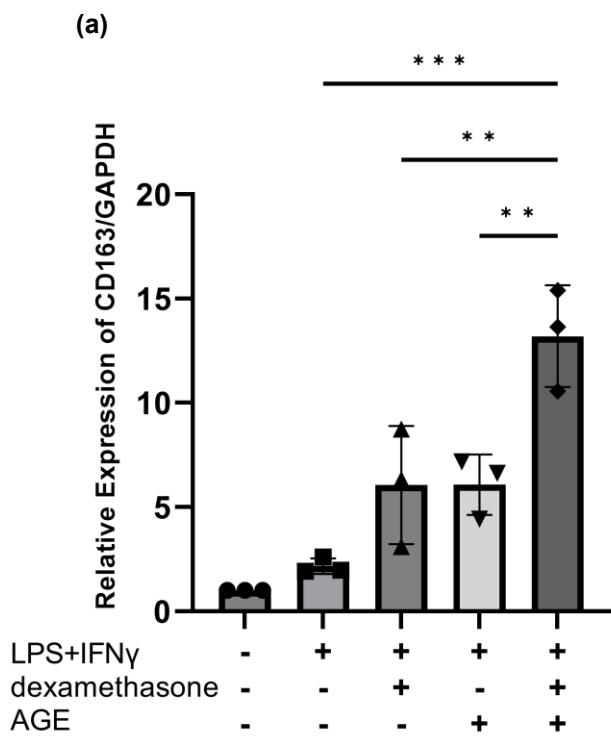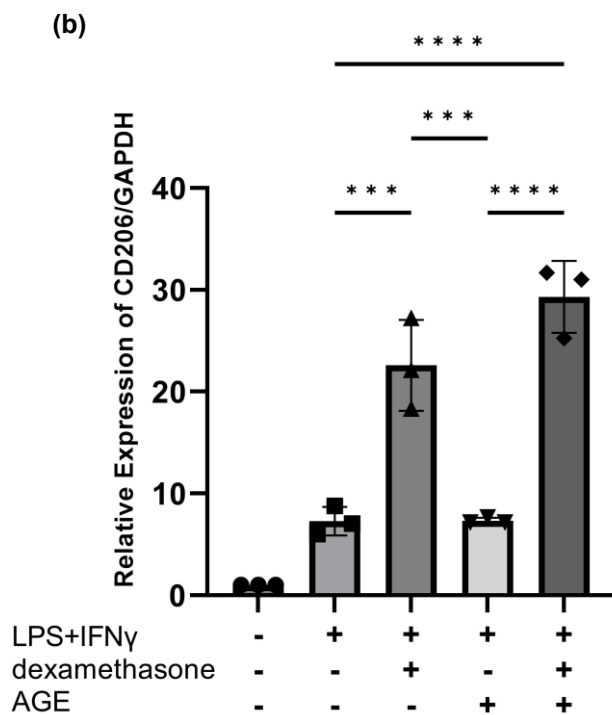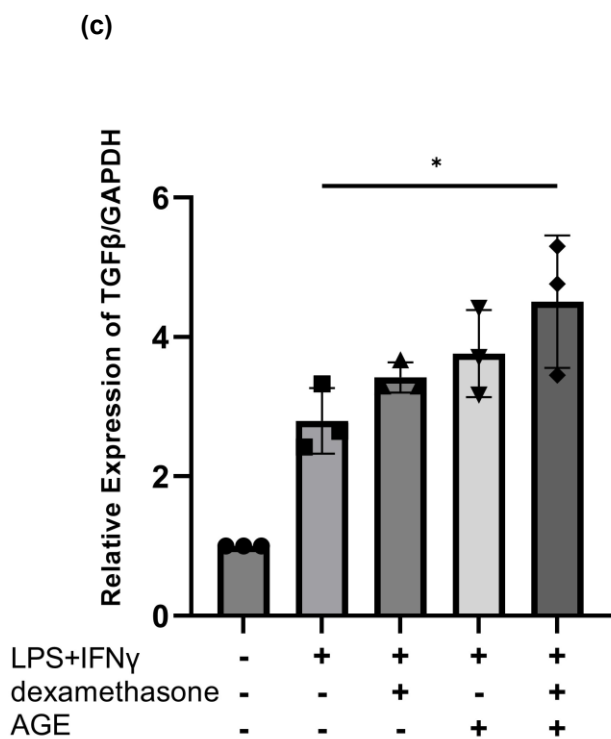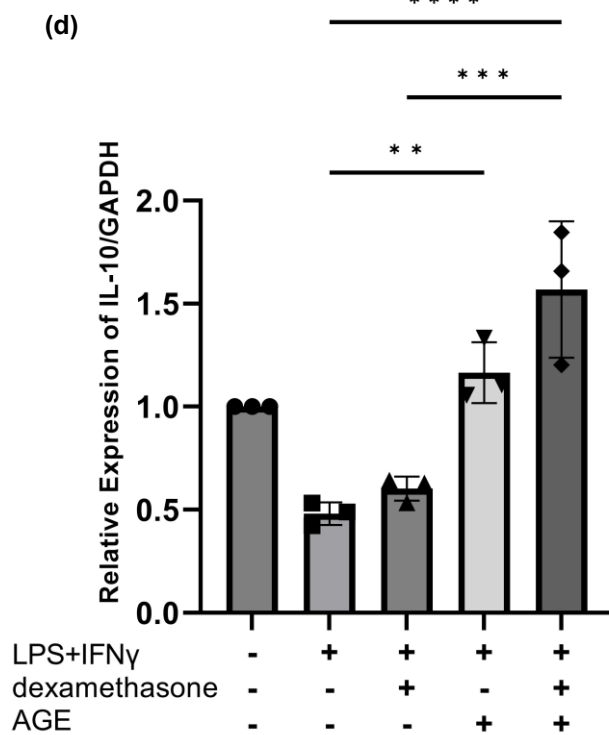

Supplement: d6fo00337k3.pdf [file d6fo00337k3.pdf]
